# Supplementary material for: ERBB2 in Cat Mammary Neoplasias Disclosed a Positive Correlation between RNA and Protein Low Expression Levels: A Model for erbB-2 Negative Human Breast Cancer
Source: PubMed Central journal article supplement (PMC3873372; doi:10.1371/journal.pone.0083673), 2013-12-26
Supplement: pone.0083673.s004.pdf [file pone.0083673.s004.pdf]

Figure S4: Reactivity observed by western immunoblot with the CBE356 and CB11 anti-erbB2 antibodies, in 3 feline mammary tissues.

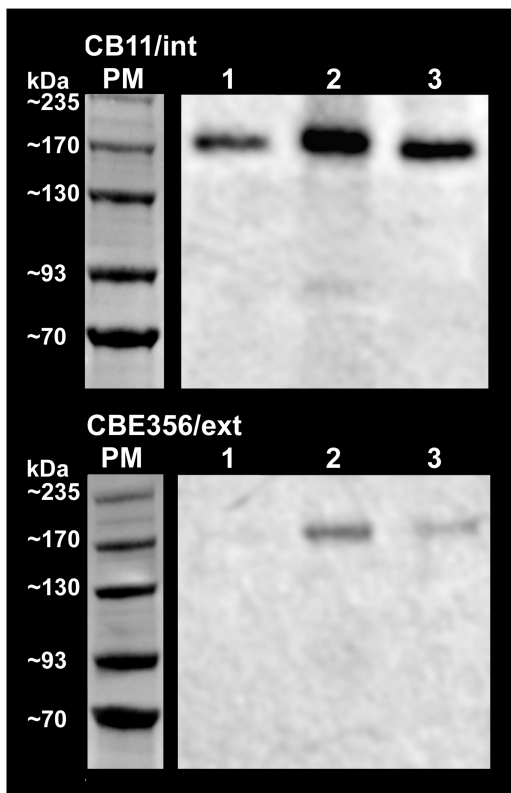

**Legend:** The expected molecular weight (185 kDa) of the reactive protein band, was determined by comparison, with the molecular weights of the standard Protein Marker (PM). Lane 1: non-neoplastic cat mammary tissues; Lanes 2-3: cat mammary lesion samples. .
