# Supplementary material for: ERBB2 in Cat Mammary Neoplasias Disclosed a Positive Correlation between RNA and Protein Low Expression Levels: A Model for erbB-2 Negative Human Breast Cancer
Source: PubMed Central journal article supplement (PMC3873372; doi:10.1371/journal.pone.0083673), 2013-12-26
Supplement: pone.0083673.s005.pdf [file pone.0083673.s005.pdf]

Figure S5: *ERBB2* DNA copy number quantification: standard curve construct and copy number / haploid genome assessment

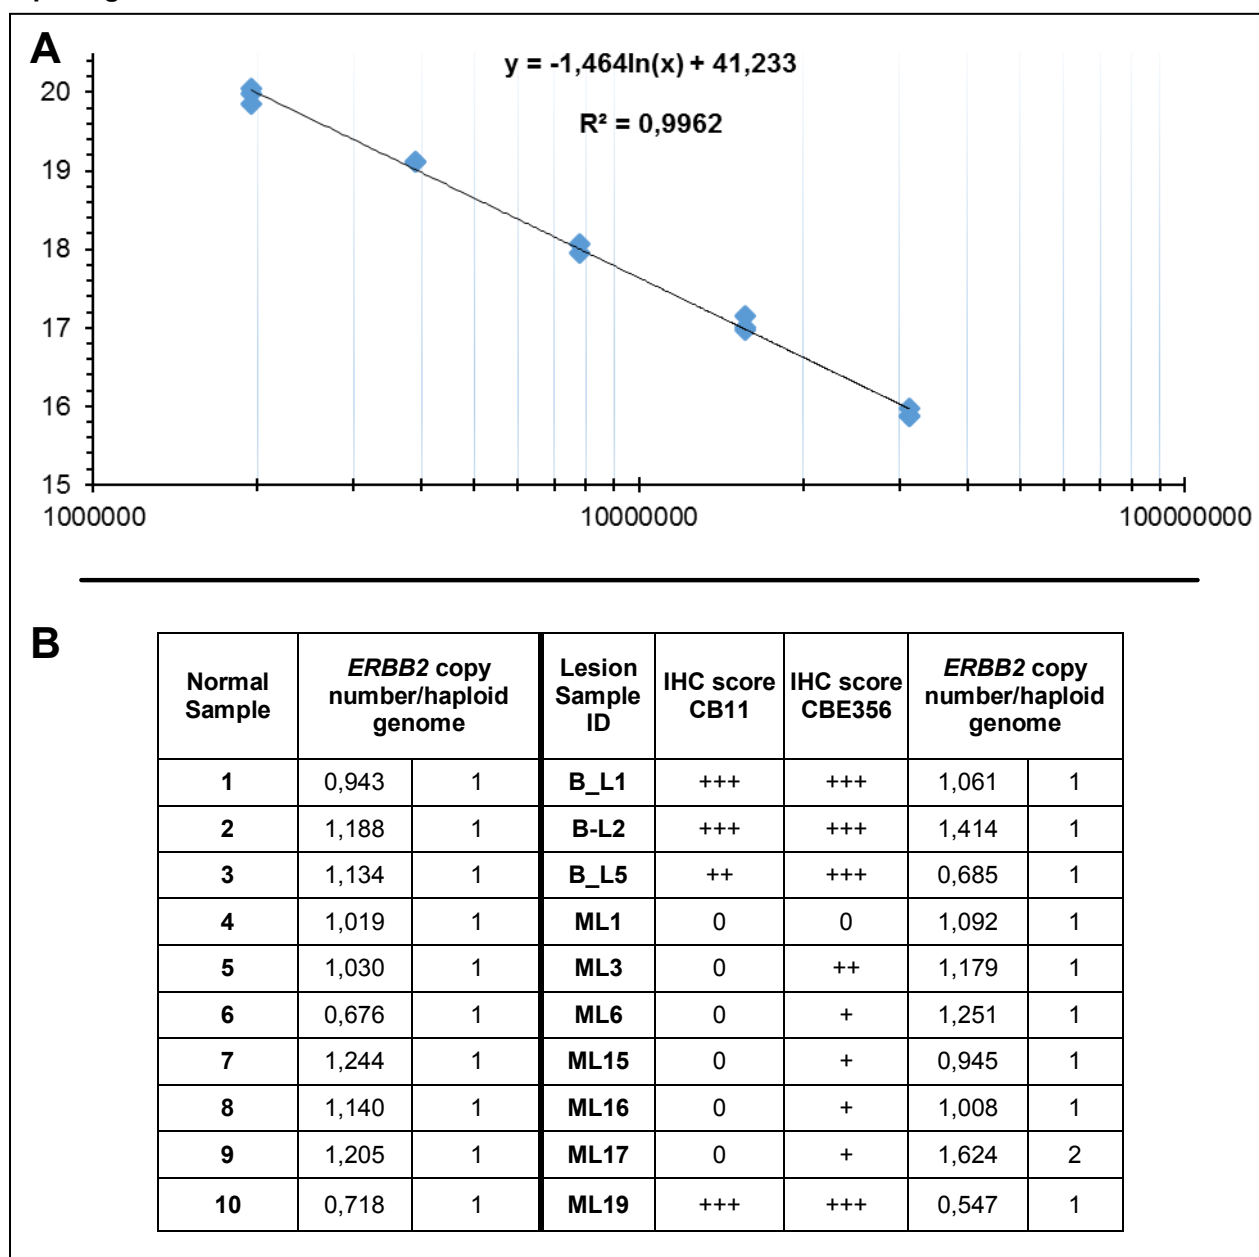

**Legend:** (A) Standard curve constructed with a 2-fold serial dilution series of the plasmid DNA with the *ERBB2* insert, ranging from  $3,12 \times 10^7$  to  $1,95 \times 10^6$  copies (5 points series dilutions, each point in triplicate). The Efficiency of the PCR reaction was 98% ( $R^2=0,996$ ). (B) 10 normal and 10 mammary lesions were subjected to real time quantitative PCR for gene copy number evaluation. In all cases we didn't detect any gene amplification. (IHC) Immunohistochemistry.
